# Supplementary material
Source: publisher figshare collection journal article supplement (https://karger.figshare.com/articles/dataset/_/7497995)
Supplement: Supplementary file 1 [file 1]

## Supplementary Materials

Table S4.

| Days post infection | Genotype       | Virus-Host Phenotype |                       |                                                |                          |
|---------------------|----------------|----------------------|-----------------------|------------------------------------------------|--------------------------|
|                     |                | Null                 | Chromosome-associated | Chromosome-associated /<br>Telomere-integrated | Telomere-integrated only |
| 1                   | 6 <sub>3</sub> | <b>60.6*</b> ± 6.7   | <b>27.2*</b> ± 2.3    | <b>7.2</b> ± 3.1                               | <b>5.0**</b> ± 1.7       |
| 1                   | 7 <sub>2</sub> | <b>29.4*</b> ± 4.2   | <b>52.8*</b> ± 5.5    | <b>17.8</b> ± 2.1                              | <b>0.0**</b> ± 0.0       |
| 4                   | 6 <sub>3</sub> | <b>53.7</b> ± 6.4    | <b>35.4**</b> ± 2.3   | <b>9.2</b> ± 4.4                               | <b>1.8**</b> ± 0.0       |
| 4                   | 7 <sub>2</sub> | <b>28.3</b> ± 6.7    | <b>58.8**</b> ± 3.8   | <b>13.0</b> ± 7.4                              | <b>0.0**</b> ± 0.0       |
| 7                   | 6 <sub>3</sub> | <b>43.7</b> ± 9.2    | <b>46.0</b> ± 5.9     | <b>9.2</b> ± 1.5                               | <b>1.2</b> ± 1.2         |
| 7                   | 7 <sub>2</sub> | <b>42.3</b> ± 10.0   | <b>42.3</b> ± 13.8    | <b>13.7</b> ± 1.5                              | <b>1.7</b> ± 1.7         |
| 14                  | 6 <sub>3</sub> | <b>38.5</b> ± 4.2    | <b>39.6*</b> ± 3.6    | <b>14.8</b> ± 1.0                              | <b>7.1</b> ± 4.2         |
| 14                  | 7 <sub>2</sub> | <b>50.6</b> ± 15.3   | <b>21.1*</b> ± 2.1    | <b>20.0</b> ± 12.2                             | <b>8.3</b> ± 4.4         |
| 21                  | 6 <sub>3</sub> | <b>32.5</b> ± 11.0   | <b>34.9</b> ± 8.1     | <b>27.2</b> ± 12.5                             | <b>5.3</b> ± 3.5         |
| 21                  | 7 <sub>2</sub> | <b>45.8</b> ± 8.5    | <b>41.6</b> ± 5.3     | <b>10.8</b> ± 6.1                              | <b>1.8</b> ± 1.7         |

**Supplementary Table 4. Viral-host cytogenomic interactions for non-oncogenic Rispens vaccine and oncogenic MDV in vaccinated and challenged disease resistant versus susceptible birds.** The mean percentages, in bold font, ± standard deviation of mitotically-dividing cells with given virus-host phenotypes from 3 samples per chicken genotype (6<sub>3</sub>; MD-resistant, 7<sub>2</sub>; MD-susceptible) between 24 hours and 21 days post-infection. The samples represent the replicating cell population in the spleens of individual birds *vaccinated with Rispens at day of hatch and challenged with oncogenic MDV (Md5) at 4 days post-hatch*. The values that were statistically-significant within a viral phenotype and within a timepoint as compared to the other genotype are indicated with a "\*" ( $p \leq 0.05$ ) or "\*\*" ( $p \leq 0.01$ ) symbol. The values that were found to be statistically-significant within a virus-host phenotype for a genotype across timepoints are indicated with a "†" ( $p \leq 0.05$ ) or "‡" ( $p \leq 0.01$ ) symbol.
