# Supplementary material
Source: publisher figshare collection journal article supplement (https://karger.figshare.com/articles/dataset/_/7497995)
Supplement: Supplementary file 2 [file 1]

Archive with 6 entries (6 files):
- 495174sm_6.pdf
- 495174sm_1.pdf
- 495174sm_2.pdf
- 495174sm_3.pdf
- 495174sm_4.pdf
- 495174sm_5.pdf
