# Supplementary material
Source: publisher figshare collection journal article supplement (https://karger.figshare.com/articles/dataset/_/7497995)
Supplement: Supplementary file 2 [file 1 › 495174sm_1.pdf]

Supplementary

Figure S1.

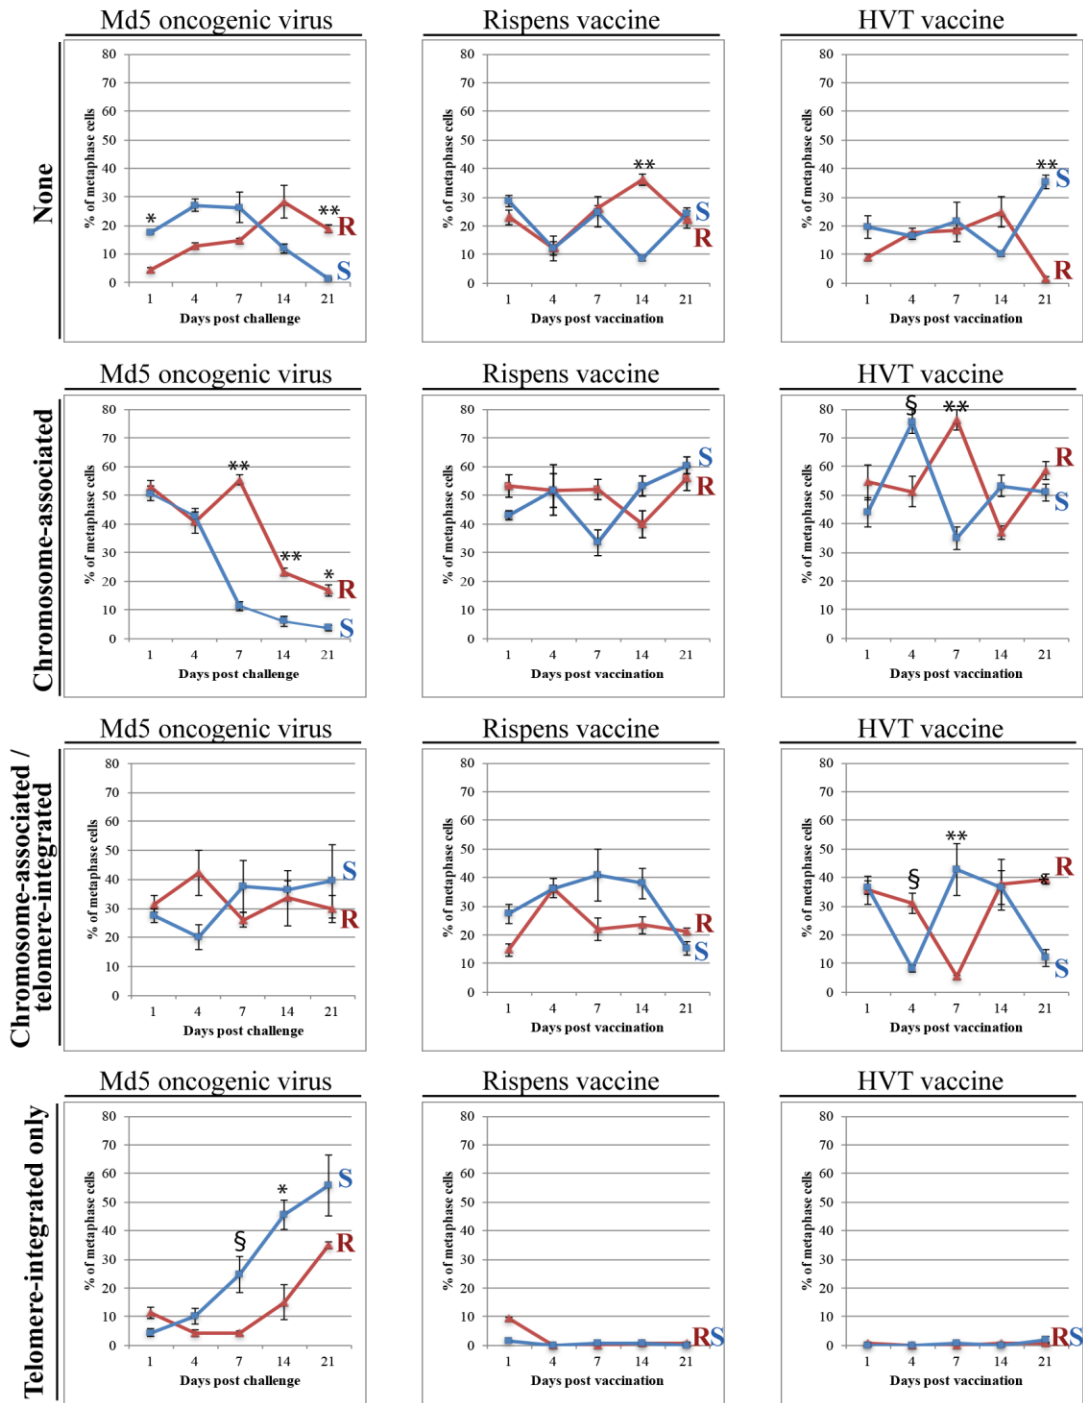

**Supplementary Figure 1. Temporal dynamics of virus-host cytogenomic interactions over time in single-treatment MD resistant (6<sub>3</sub>) versus susceptible (7<sub>2</sub>) genotype birds.** Each column of graphs encompasses the cytogenomic phenotype data set for 6<sub>3</sub> (**MD-resistant**), shown as a **red line with an adjacent “R”**, and 7<sub>2</sub> (**MD-susceptible**), shown as a **blue line with an adjacent “S”**, genotype birds infected with a single treatment of oncogenic (Md5), or non-oncogenic (Rispen or HVT vaccine) MDV strains. The lines represent the mean percentage of mitotically-dividing host cells with a given phenotype  $\pm$  SEM for 3 birds per treatment group across all early timepoints (1-21 dpi). The mean percentage values that were statistically significant between genotypes 6<sub>3</sub> and 7<sub>2</sub> are indicated with a “§” ( $p \leq 0.1$ ), “\*” ( $p \leq 0.05$ ) or “\*\*\*” ( $p \leq 0.01$ ) symbol.
