# Supplementary material
Source: publisher figshare collection journal article supplement (https://karger.figshare.com/articles/dataset/_/7497995)
Supplement: Supplementary file 2 [file 1 › 495174sm_2.pdf]

Supplementary Materials

Figure S2.

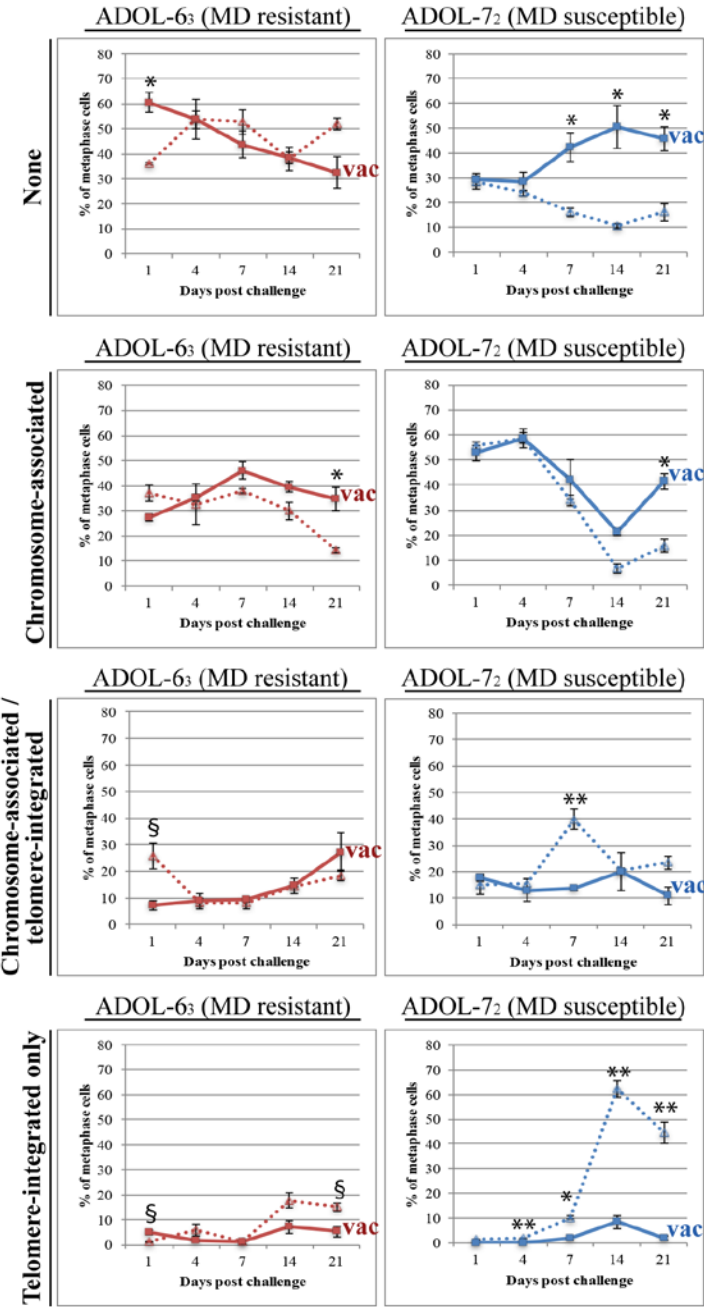

**Supplementary Figure 2. Temporal dynamics of oncogenic MDV in unvaccinated + challenged birds versus the Rispens vaccine and oncogenic MDV in vaccinated + challenged birds, of the resistant (6<sub>3</sub>) and susceptible (7<sub>2</sub>) genotypes.** Each column of graphs indicates the cytogenomic phenotype data for 6<sub>3</sub> (**MD-resistant**), shown in left panels with **red line** graphs, versus 7<sub>2</sub> (**MD-susceptible**), shown in right panels with **blue line** graphs, bird genotypes. **Dashed lines** indicate the cytogenomic phenotype data for **oncogenic MDV (Md5) challenged-only birds** and **solid lines with an adjacent “vac”** indicate the data for **Rispens-vaccinated and Md5-challenged birds**. The lines represent the mean percentage of mitotically-dividing host cells with a given phenotype  $\pm$  SEM for 3 birds per treatment group across all early timepoints (1-21 dpi). The mean percentage values that were statistically significant between the MDV challenged-only versus the Rispens vaccinated and MDV challenged treatment groups are indicated with a “§” ( $p \leq 0.1$ ), “\*” ( $p \leq 0.05$ ) or “\*\*\*” ( $p \leq 0.01$ ) symbol. All mitotically-dividing cells with the telomere-integrated only virus-host phenotype represent solely an oncogenic MDV (Md5) infection (*i.e.* no Rispens vaccine present). Conversely, the chromosome-associated and the chromosome-associated/ telomere-integrated phenotypes indicate host cells containing the Rispens vaccine or oncogenic MDV (Md5) or both.
