# Supplementary material
Source: publisher figshare collection journal article supplement (https://karger.figshare.com/articles/dataset/_/7497995)
Supplement: Supplementary file 2 [file 1 › 495174sm_3.pdf]

## Supplementary Materials

Table S1.

| Days post infection | Virus type | Virus-Host Phenotype |                       |                                             |                          |
|---------------------|------------|----------------------|-----------------------|---------------------------------------------|--------------------------|
|                     |            | Null                 | Chromosome-associated | Chromosome-associated / Telomere-integrated | Telomere-integrated only |
| 1                   | Md5        | <b>4.5</b> ± 1.5     | <b>52.8</b> ± 4.0     | <b>31.5</b> ± 5.0                           | <b>11.2</b> ± 3.5        |
| 1                   | Rispens    | <b>22.9</b> ± 4.7    | <b>53.2</b> ± 6.7     | <b>14.7</b> ± 4.0                           | <b>9.2</b> ± 1.2         |
| 1                   | HVT        | <b>9.1</b> ± 2.1     | <b>54.6</b> ± 10.5    | <b>35.7</b> ± 8.5                           | <b>0.7</b> ± 0.6         |
| 4                   | Md5        | <b>12.9</b> ± 1.7    | <b>40.5</b> ± 6.4     | <b>42.2</b> ± 13.7                          | <b>4.3</b> ± 2.1         |
| 4                   | Rispens    | <b>12.2</b> ± 4.0    | <b>51.8</b> ± 15.1    | <b>36.0</b> ± 2.1                           | <b>0.0</b> ± 0.0         |
| 4                   | HVT        | <b>17.7</b> ± 2.3    | <b>51.2</b> ± 9.2     | <b>31.1</b> ± 6.0                           | <b>0.0</b> ± 0.0         |
| 7                   | Md5        | <b>14.6</b> ± 1.7    | <b>55.2</b> ± 3.1     | <b>26.1</b> ± 4.5                           | <b>4.2**</b> ± 1.5       |
| 7                   | Rispens    | <b>26.3*</b> ± 1.7   | <b>51.9</b> ± 6.1     | <b>21.9</b> ± 7.0                           | <b>0.0</b> ± 0.0         |
| 7                   | HVT        | <b>18.3</b> ± 1.5    | <b>76.3*†</b> ± 7.0   | <b>5.3*‡</b> ± 1.0                          | <b>0.0</b> ± 0.0         |
| 14                  | Md5        | <b>28.3</b> ± 10.0   | <b>23.1</b> ± 2.3     | <b>33.5</b> ± 16.6                          | <b>15.0*</b> ± 10.7      |
| 14                  | Rispens    | <b>36.1</b> ± 3.6    | <b>39.9</b> ± 8.2     | <b>23.4</b> ± 5.1                           | <b>0.6</b> ± 0.6         |
| 14                  | HVT        | <b>24.9</b> ± 9.3    | <b>37.0</b> ± 4.0     | <b>37.6</b> ± 15.3                          | <b>0.6</b> ± 0.6         |
| 21                  | Md5        | <b>18.8</b> ± 2.5    | <b>16.7**</b> ± 3.2   | <b>29.7</b> ± 8.1                           | <b>34.7**</b> ± 2.0      |
| 21                  | Rispens    | <b>22.0</b> ± 5.0    | <b>55.9</b> ± 7.6     | <b>21.2</b> ± 2.1                           | <b>0.9</b> ± 0.6         |
| 21                  | HVT        | <b>1.4**</b> ± 1.2   | <b>58.6</b> ± 5.5     | <b>39.3</b> ± 3.1                           | <b>0.7</b> ± 0.6         |

**Supplementary Table 1. Viral-host cytogenomic interactions for oncogenic and non-oncogenic MDV strains in disease-resistant, genotype 6<sub>3</sub>, chickens.** The mean percentages, in bold font, ± standard deviation of mitotically-dividing cells with given virus-host phenotypes from 3 samples per treatment type (Md5; oncogenic MDV, non-oncogenic MD vaccines; Rispens, HVT) between 24 hours and 21 days post-infection. The samples represent the replicating cell population in the spleens of individual genotype 6<sub>3</sub> (MD-resistant) birds. The values that were statistically-significant within a

viral phenotype and within a timepoint as compared to the other treatment types (MDV strains) are indicated with a "\*" ( $p \leq 0.05$ ) or "\*\*\*" ( $p \leq 0.01$ ) symbol. The values that were found to be statistically-significant within a virus-host phenotype for a treatment type (MDV strain) across timepoints are indicated with a "†" ( $p \leq 0.05$ ) or "‡" ( $p \leq 0.01$ ) symbol.
