# Supplementary material
Source: publisher figshare collection journal article supplement (https://karger.figshare.com/articles/dataset/_/7497995)
Supplement: Supplementary file 2 [file 1 › 495174sm_4.pdf]

Table S2.

| Days post infection | Virus type | Virus-Host Phenotype |                       |                                             |                          |
|---------------------|------------|----------------------|-----------------------|---------------------------------------------|--------------------------|
|                     |            | Null                 | Chromosome-associated | Chromosome-associated / Telomere-integrated | Telomere-integrated only |
| 1                   | Md5        | <b>17.6</b> ± 1.2    | <b>50.6</b> ± 4.6     | <b>27.5</b> ± 4.0                           | <b>4.4</b> ± 2.3         |
| 1                   | Rispens    | <b>28.6</b> ± 3.5    | <b>42.9</b> ± 2.7     | <b>27.3</b> ± 5.6                           | <b>1.3</b> ± 0.6         |
| 1                   | HVT        | <b>19.5</b> ± 6.8    | <b>44.1</b> ± 8.7     | <b>36.4</b> ± 4.0                           | <b>0.0</b> ± 0.0         |
| 4                   | Md5        | <b>27.0</b> ± 3.8    | <b>42.8</b> ± 4.5     | <b>20.1</b> ± 7.6                           | <b>10.1</b> ± 4.6        |
| 4                   | Rispens    | <b>12.1</b> ± 7.8    | <b>51.6</b> ± 10.0    | <b>36.3</b> ± 6.0                           | <b>0.0</b> ± 0.0         |
| 4                   | HVT        | <b>16.3</b> ± 2.1    | <b>75.6</b> ± 8.0     | <b>8.1</b> ± 2.1                            | <b>0.0</b> ± 0.0         |
| 7                   | Md5        | <b>26.2</b> ± 9.3    | <b>11.4</b> ± 2.9     | <b>37.6</b> ± 15.2                          | <b>24.8*</b> ± 10.8      |
| 7                   | Rispens    | <b>24.8</b> ± 9.1    | <b>33.6</b> ± 7.8     | <b>40.9</b> ± 15.7                          | <b>0.7</b> ± 0.6         |
| 7                   | HVT        | <b>21.4</b> ± 11.8   | <b>35.0</b> ± 6.7     | <b>42.9</b> ± 15.9                          | <b>0.7</b> ± 0.6         |
| 14                  | Md5        | <b>11.9</b> ± 3.1    | <b>5.9**</b> ± 3.1    | <b>36.4</b> ± 5.5                           | <b>45.6**</b> ± 8.9      |
| 14                  | Rispens    | <b>8.4</b> ± 1.2     | <b>53.2</b> ± 6.0     | <b>37.9</b> ± 9.0                           | <b>0.5</b> ± 0.6         |
| 14                  | HVT        | <b>10.2</b> ± 1.2    | <b>53.2</b> ± 6.6     | <b>36.6</b> ± 10.4                          | <b>0.0</b> ± 0.0         |
| 21                  | Md5        | <b>1.2†**</b> ± 0.6  | <b>3.6**</b> ± 1.7    | <b>39.4</b> ± 22.0                          | <b>55.8*</b> ± 18.5      |
| 21                  | Rispens    | <b>24.3</b> ± 3.5    | <b>60.4</b> ± 5.0     | <b>15.3</b> ± 4.0                           | <b>0.0</b> ± 0.0         |
| 21                  | HVT        | <b>35.2</b> ± 4.0    | <b>50.9</b> ± 5.2     | <b>12.0</b> ± 5.0                           | <b>1.9</b> ± 1.7         |

**Supplementary Table 2. Viral-host cytogenomic interactions for oncogenic and non-oncogenic MDV strains in disease-susceptible, genotype 7<sub>2</sub>, chickens.** The mean percentages, in bold font, ± standard deviation of mitotically-dividing cells with given virus-host phenotypes from 3 samples per treatment type (Md5; oncogenic MDV, non-oncogenic MD vaccines; Rispens, HVT) between 24 hours and 21 days post-infection. The samples represent the replicating cell population in the spleens of individual genotype 7<sub>2</sub> (MD-susceptible) birds. The values that were statistically-significant within a viral phenotype and within a timepoint as compared to the other treatment types (MDV

strains) are indicated with a "\*" ( $p \leq 0.05$ ) or "\*\*\*" ( $p \leq 0.01$ ) symbol. The values that were found to be statistically-significant within a virus-host phenotype for a treatment type (MDV strain) across timepoints are indicated with a "†" ( $p \leq 0.05$ ) or "‡" ( $p \leq 0.01$ ) symbol.
