# Supplementary material
Source: publisher figshare collection journal article supplement (https://karger.figshare.com/articles/dataset/_/7497995)
Supplement: Supplementary file 2 [file 1 › 495174sm_5.pdf]

## Supplementary Materials

Table S3.

| Days post infection | Genotype       | Virus-Host Phenotype |                       |                                             |                          |
|---------------------|----------------|----------------------|-----------------------|---------------------------------------------|--------------------------|
|                     |                | Null                 | Chromosome-associated | Chromosome-associated / Telomere-integrated | Telomere-integrated only |
| 1                   | 6 <sub>3</sub> | <b>36.0</b> ± 1.0    | <b>37.1</b> ± 5.9     | <b>25.7</b> ± 8.2                           | <b>1.1</b> ± 0.6         |
| 1                   | 7 <sub>2</sub> | <b>28.3</b> ± 4.6    | <b>55.6</b> ± 2.5     | <b>15.0</b> ± 6.1                           | <b>1.1</b> ± 0.6         |
| 4                   | 6 <sub>3</sub> | <b>53.7</b> ± 13.9   | <b>32.6</b> ± 14.2    | <b>8.0</b> ± 3.5                            | <b>5.7</b> ± 4.0         |
| 4                   | 7 <sub>2</sub> | <b>23.9</b> ± 2.3    | <b>58.7</b> ± 6.7     | <b>15.5</b> ± 3.5                           | <b>1.9</b> ± 0.0         |
| 7                   | 6 <sub>3</sub> | <b>52.8**</b> ± 8.5  | <b>38.0</b> ± 1.5     | <b>7.9*</b> ± 3.5                           | <b>1.2*</b> ± 1.2        |
| 7                   | 7 <sub>2</sub> | <b>16.1**</b> ± 2.7  | <b>33.9</b> ± 3.6     | <b>39.8*</b> ± 6.7                          | <b>10.2†*</b> ± 1.2      |
| 14                  | 6 <sub>3</sub> | <b>37.8*</b> ± 8.0   | <b>30.0</b> ± 6.1     | <b>14.4</b> ± 4.9                           | <b>17.8**</b> ± 5.1      |
| 14                  | 7 <sub>2</sub> | <b>10.6*</b> ± 1.5   | <b>6.7</b> ± 3.6      | <b>20.6</b> ± 1.5                           | <b>62.2**</b> ± 5.9      |
| 21                  | 6 <sub>3</sub> | <b>51.9*</b> ± 4.4   | <b>14.5</b> ± 1.5     | <b>18.4</b> ± 3.6                           | <b>15.1*</b> ± 2.7       |
| 21                  | 7 <sub>2</sub> | <b>16.2*</b> ± 6.4   | <b>15.6</b> ± 4.5     | <b>23.5</b> ± 4.4                           | <b>44.7*</b> ± 7.5       |

**Supplementary Table 3. Viral-host cytogenomic interactions for oncogenic MDV in unvaccinated and challenged disease resistant versus susceptible birds.** The mean percentages, in bold font, ± standard deviation of mitotically-dividing cells with given virus-host phenotypes from 3 samples per bird genotype (6<sub>3</sub>; MD-resistant, 7<sub>2</sub>; MD-susceptible) between 24 hours and 21 days post-infection. The samples represent the replicating cell population in the spleens of individual birds *challenged with oncogenic MDV (Md5) alone at 4 days post-hatch*. The values that were statistically-significant within a viral phenotype and within a timepoint as compared to the other genotype are indicated with a "\*" (p ≤ 0.05) or "\*\*\*" (p ≤ 0.01) symbol. The values that were found to be statistically-significant within a virus-host phenotype for a genotype across timepoints are indicated with a "†" (p ≤ 0.05) or "‡" (p ≤ 0.01) symbol.
